# Supplementary material for: Pronounced genetic differentiation and recent secondary contact in the mangrove tree Lumnitzera racemosa revealed by population genomic analyses
Source: PubMed Central journal article supplement (PMC4933931; doi:10.1038/srep29486), 2016-07-06
Supplement: srep29486-s1.pdf [file srep29486-s1.pdf]

**SUPPLEMENTARY INFORMATION**

**Pronounced genetic differentiation and recent secondary contact in the mangrove tree *Lumnitzera racemosa* revealed by population genomic analyses**

Jianfang Li<sup>1</sup>, Yuchen Yang<sup>1</sup>, Qipian Chen<sup>1</sup>, Lu Fang<sup>1</sup>, Ziwen He<sup>1</sup>, Wuxia Guo<sup>1</sup>, Sitan Qiao<sup>1</sup>, Zhengzhen Wang<sup>1</sup>, Miaomiao Guo<sup>1</sup>, Cairong Zhong<sup>2</sup>,

Renchao Zhou<sup>1\*</sup> and Suhua Shi<sup>1\*</sup>

**Supplementary Figure S1.** Mismatch rates in each position of the reads (a) and the correlation between base quality and mismatch rate (b) in five populations of *Lumnitzera racemosa*. We trimmed the first five bases and the last seven bases of the mapped reads of QH, SY and KP population, and trimmed the first five bases and last ten bases of the mapped reads of JH and KD population. For five populations, we filtered the bases with quality scores lower than 22. Population abbreviations are defined in Table 1.

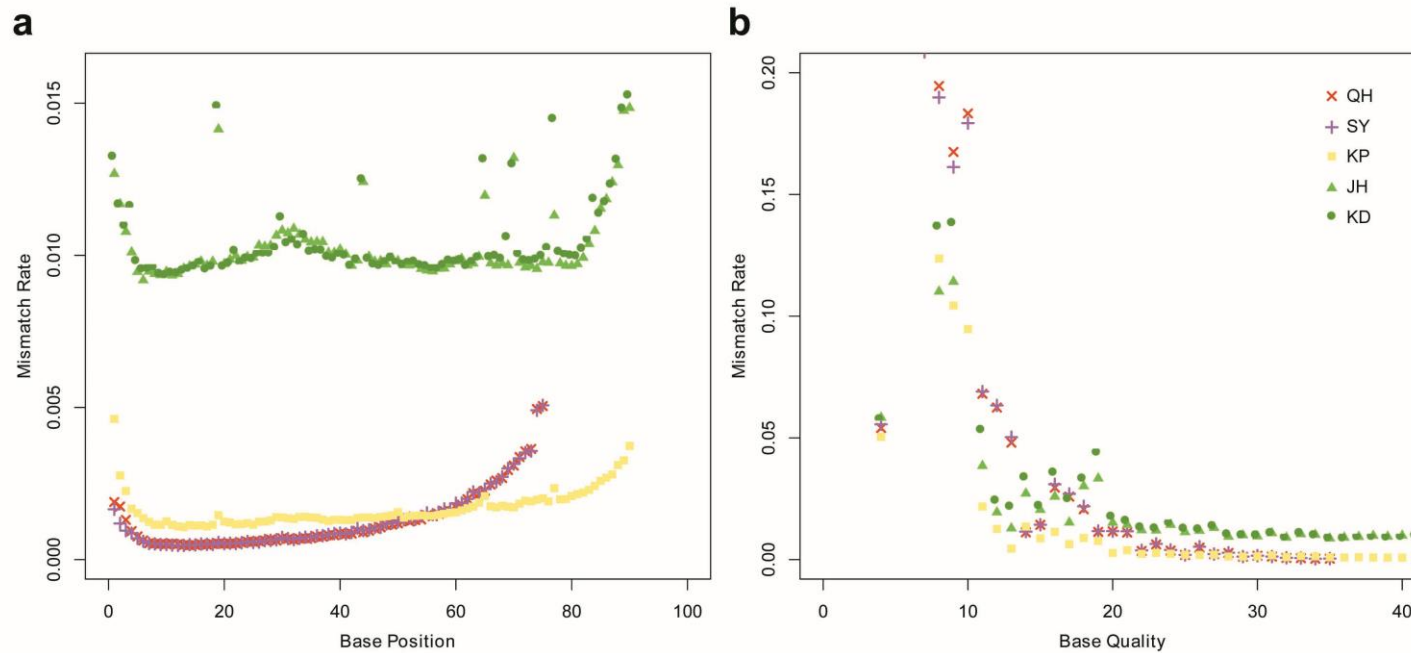

**Supplementary Figure S2.** Haplotype networks and distributions of 85 additional polymorphic gene segments in five populations. Each colour represents a population. Each circle represents a single haplotype. The size of the circle in each haplotype network is proportional to haplotype frequency. Each branch with more than one mutational step is labelled. Population abbreviations are defined in Table 1.

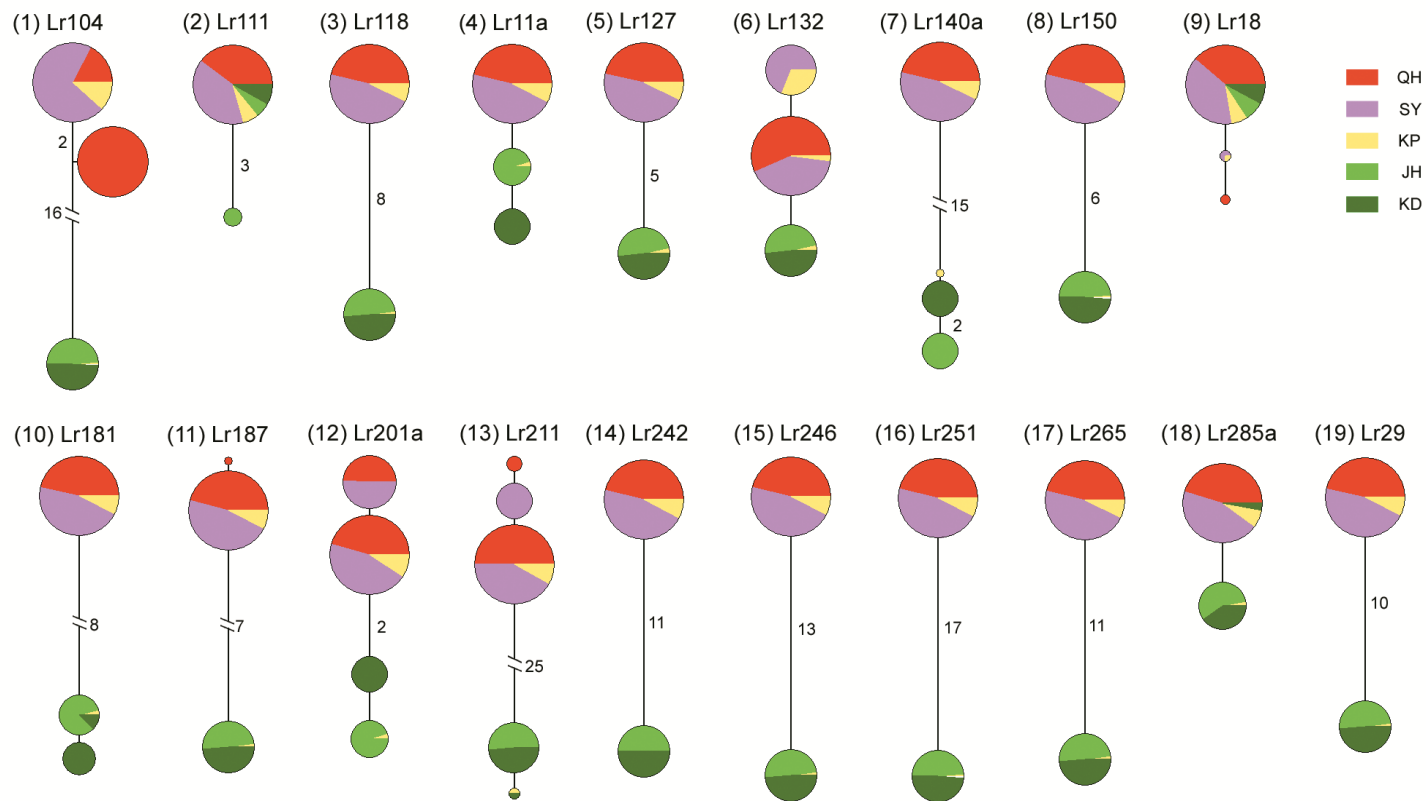

(20) Lr292b (21) Lr300 (22) Lr313a (23) Lr317 (24) Lr337a (25) Lr360 (26) Lr368a (27) Lr368b (28) Lr374 (29) Lr377

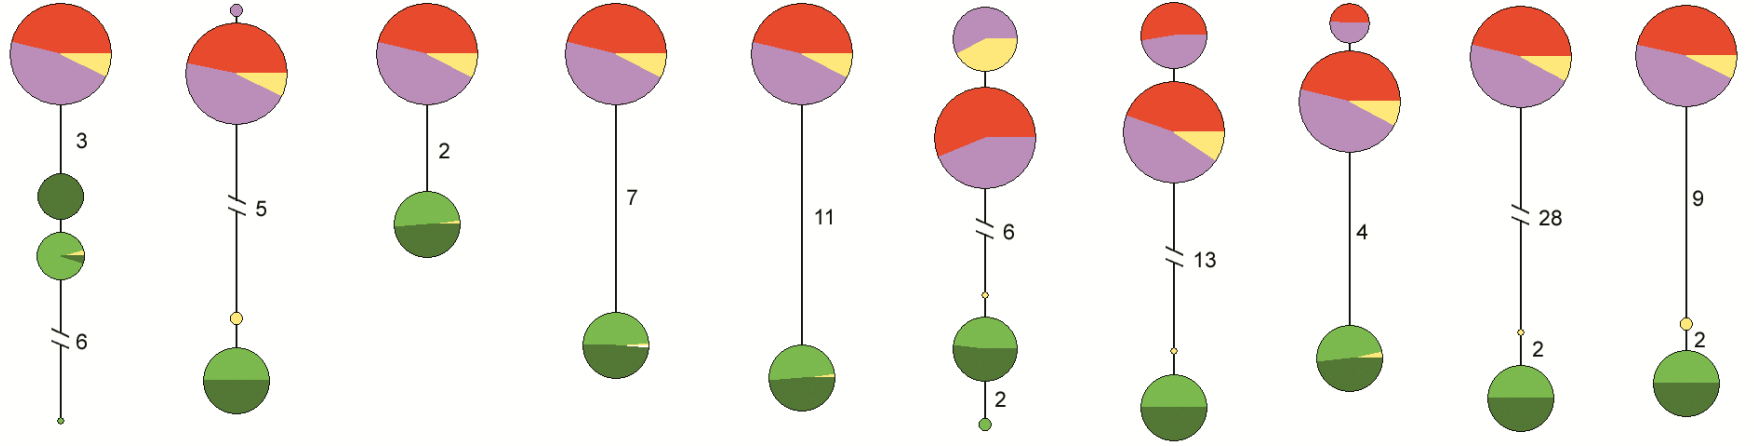

(30) Lr382 (31) Lr39 (32) Lr409 (33) Lr439 (34) Lr453 (35) Lr477\_1 (36) Lr477\_2 (37) Lr483 (38) Lr501 (39) Lr507

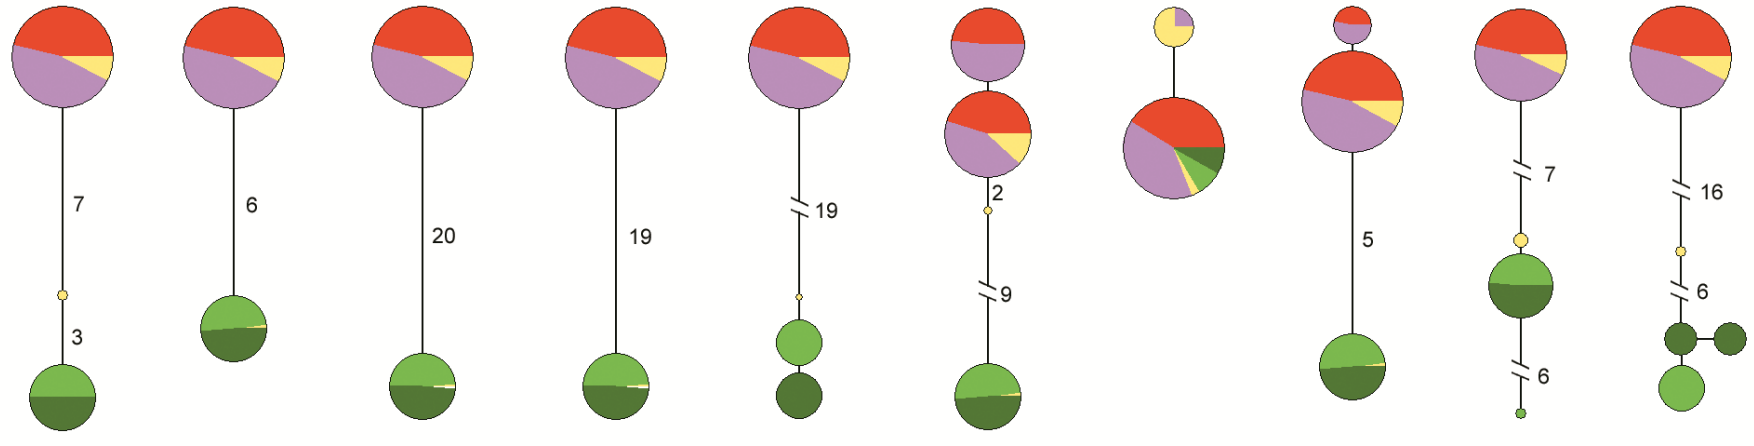

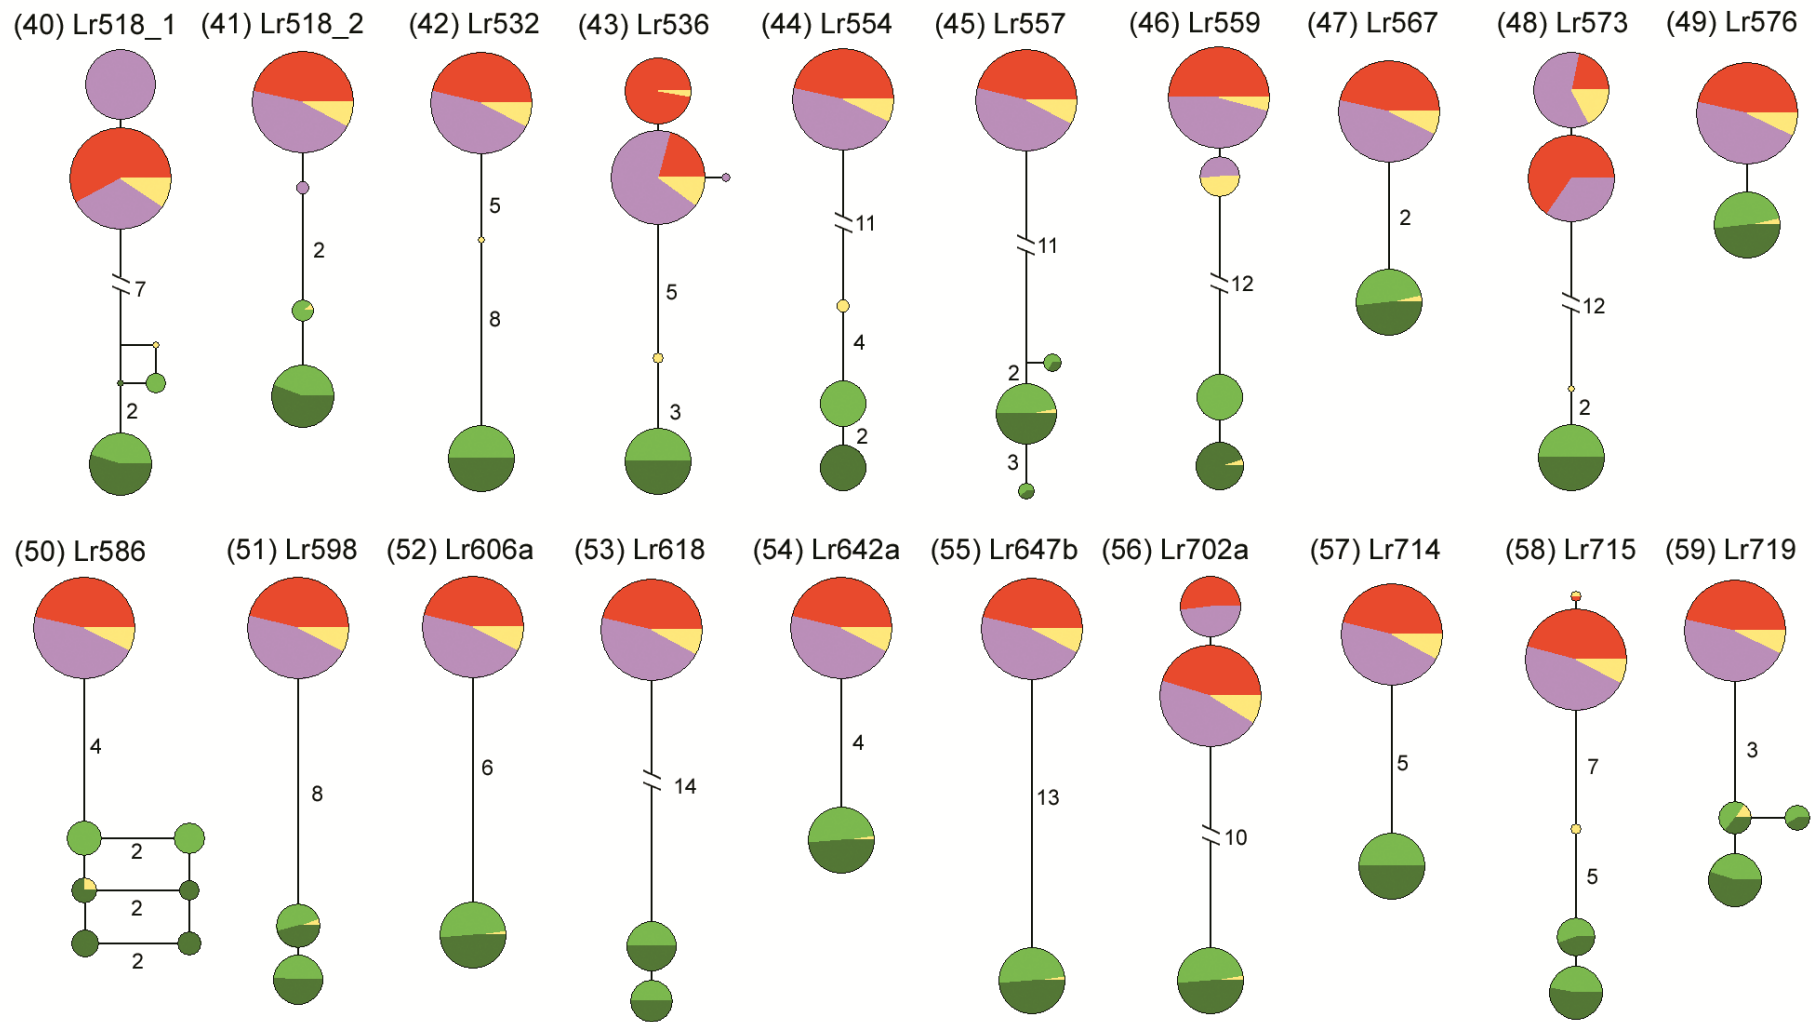

(60) Lr736

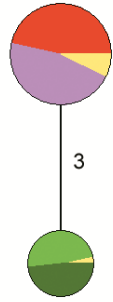

(61) Lr746

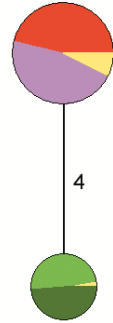

(62) Lr756

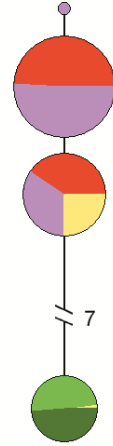

(63) Lr768a

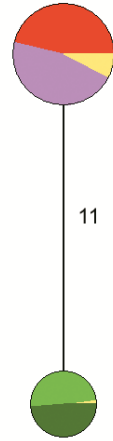

(64) Lr785

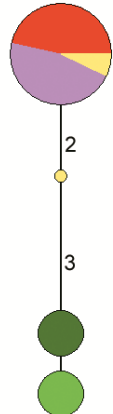

(65) Lr788

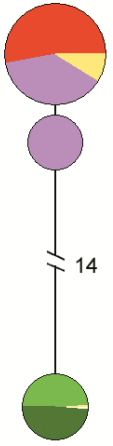

(66) Lr8

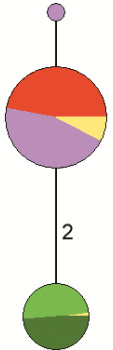

(67) Lr81

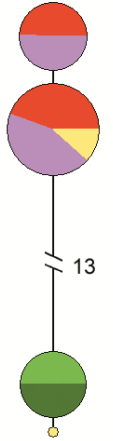

(68) Lr810

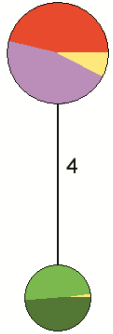

(69) Lr811

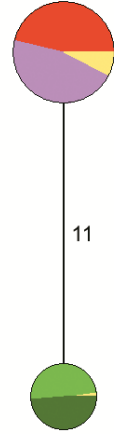

(70) Lr822

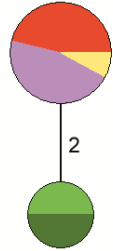

(71) Lr824

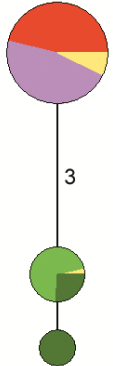

(72) Lr840

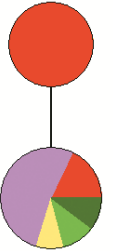

(73) Lr902

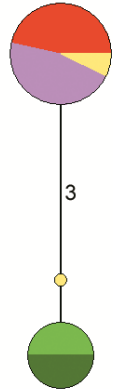

(74) Lr904

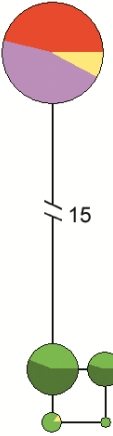

(75) Lr906

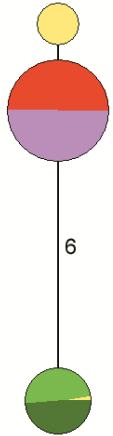

(76) Lr915

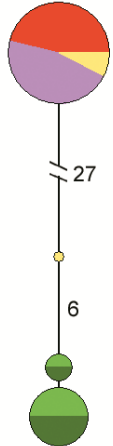

(77) Lr923

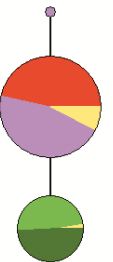

(78) Lr926

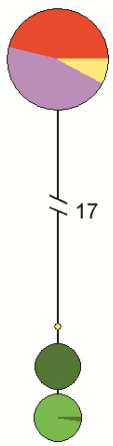

(79) Lr930b

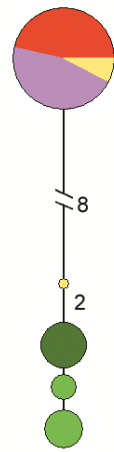

(80) Lr98a

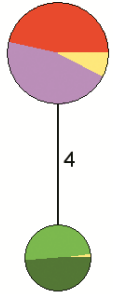

(81) Lr14

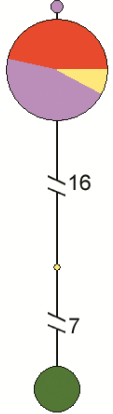

(82) Lr175a

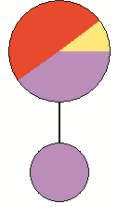

(83) Lr525a

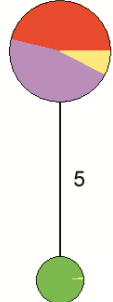

(84) Lr551\_1

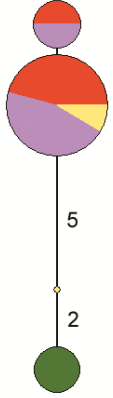

(85) Lr551\_2

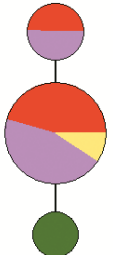

**Supplementary Figure S3.** Plot of delta K values of 10 runs that assumed one to 10 clusters (K = 1 - 10).

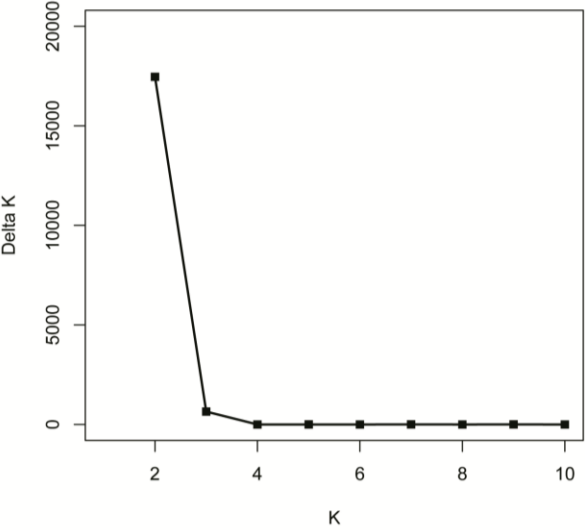



**Supplementary Table S1.** Population, sample size and nucleotide diversity at six nuclear genes of 17 populations of *Lumnitzera racemosa* from the Indo-West Pacific region. Alignment gaps were excluded for the calculation of nucleotide diversity ( $\pi$ ) and polymorphism ( $\theta$ ). Population abbreviations are defined in Table 1.

| Gene  |                           | GX    | SM    | SC    | QH    | SY    | DW    | QL    | KP    | YS    | TN    | KN    | BL    | TP    | JH    | KD    | BT    | RK    | Total |       |
|-------|---------------------------|-------|-------|-------|-------|-------|-------|-------|-------|-------|-------|-------|-------|-------|-------|-------|-------|-------|-------|-------|
| Lr104 | N                         | 12    | 20    | 20    | 20    | 20    | 20    | 20    | 17    | 11    | 20    | 18    | 20    | 10    | 20    | 20    | 17    | 10    | 295   |       |
|       | S                         | 0     | 3     | 0     | 3     | 0     | 4     | 4     | 19    | 3     | 4     | 19    | 19    | 0     | 0     | 0     | 0     | 0     | 22    |       |
|       | H                         | 1     | 2     | 1     | 2     | 1     | 3     | 3     | 2     | 2     | 3     | 2     | 2     | 1     | 1     | 1     | 1     | 1     | 7     |       |
|       | Hd                        | 0.000 | 0.050 | 0.000 | 0.409 | 0.000 | 0.555 | 0.512 | 0.214 | 0.312 | 0.631 | 0.056 | 0.142 | 0.000 | 0.000 | 0.000 | 0.000 | 0.000 | 0.000 | 0.692 |
|       | $\pi (\times 10^{-3})$    | 0.000 | 0.100 | 0.000 | 0.860 | 0.000 | 1.140 | 1.350 | 2.690 | 0.650 | 1.390 | 0.700 | 1.790 | 0.000 | 0.000 | 0.000 | 0.000 | 0.000 | 0.000 | 5.610 |
|       | $\theta (\times 10^{-3})$ | 0.000 | 0.490 | 0.000 | 0.490 | 0.000 | 0.660 | 0.660 | 3.080 | 0.570 | 0.660 | 3.030 | 2.960 | 0.000 | 0.000 | 0.000 | 0.000 | 0.000 | 0.000 | 2.110 |
| Lr265 | N                         | 12    | 20    | 20    | 20    | 20    | 20    | 20    | 17    | 11    | 20    | 18    | 20    | 10    | 20    | 20    | 17    | 10    | 295   |       |
|       | S                         | 0     | 0     | 0     | 0     | 0     | 1     | 1     | 13    | 0     | 0     | 13    | 0     | 0     | 0     | 0     | 0     | 0     | 14    |       |
|       | H                         | 1     | 1     | 1     | 1     | 1     | 2     | 2     | 2     | 1     | 1     | 2     | 1     | 1     | 1     | 1     | 1     | 1     | 4     |       |
|       | Hd                        | 0.000 | 0.000 | 0.000 | 0.000 | 0.000 | 0.450 | 0.481 | 0.258 | 0.000 | 0.000 | 0.108 | 0.000 | 0.000 | 0.000 | 0.000 | 0.000 | 0.000 | 0.000 | 0.422 |
|       | $\pi (\times 10^{-3})$    | 0.000 | 0.000 | 0.000 | 0.000 | 0.000 | 0.000 | 0.000 | 3.370 | 0.000 | 0.000 | 1.410 | 0.000 | 0.000 | 0.000 | 0.000 | 0.000 | 0.000 | 0.000 | 5.320 |
|       | $\theta (\times 10^{-3})$ | 0.000 | 0.000 | 0.000 | 0.000 | 0.000 | 0.000 | 0.000 | 3.190 | 0.000 | 0.000 | 3.150 | 0.000 | 0.000 | 0.000 | 0.000 | 0.000 | 0.000 | 0.000 | 2.050 |
| Lr559 | N                         | 12    | 20    | 20    | 20    | 20    | 20    | 20    | 17    | 11    | 20    | 18    | 20    | 10    | 20    | 20    | 17    | 10    | 295   |       |
|       | S                         | 0     | 1     | 1     | 1     | 1     | 0     | 0     | 14    | 14    | 14    | 13    | 1     | 14    | 0     | 0     | 0     | 0     | 14    |       |
|       | H                         | 1     | 2     | 2     | 2     | 2     | 1     | 1     | 3     | 2     | 3     | 2     | 2     | 4     | 1     | 1     | 1     | 1     | 4     |       |
|       | Hd                        | 0.000 | 0.508 | 0.262 | 0.097 | 0.142 | 0.000 | 0.000 | 0.629 | 0.173 | 0.344 | 0.056 | 0.050 | 0.437 | 0.000 | 0.000 | 0.000 | 0.000 | 0.000 | 0.698 |
|       | $\pi (\times 10^{-3})$    | 0.000 | 0.630 | 0.330 | 0.120 | 0.180 | 0.000 | 0.000 | 4.820 | 3.020 | 4.640 | 0.900 | 0.060 | 4.740 | 0.000 | 0.000 | 0.000 | 0.000 | 0.000 | 7.000 |
|       | $\theta (\times 10^{-3})$ | 0.000 | 0.290 | 0.290 | 0.290 | 0.290 | 0.000 | 0.000 | 4.260 | 4.780 | 4.100 | 3.900 | 0.290 | 4.910 | 0.000 | 0.000 | 0.000 | 0.000 | 0.000 | 2.510 |
| Lr598 | N                         | 12    | 20    | 20    | 20    | 20    | 20    | 20    | 17    | 11    | 20    | 17    | 20    | 8     | 19    | 20    | 17    | 10    | 291   |       |

|       |                           |       |       |       |       |       |       |       |       |       |       |       |       |       |       |       |       |       |       |
|-------|---------------------------|-------|-------|-------|-------|-------|-------|-------|-------|-------|-------|-------|-------|-------|-------|-------|-------|-------|-------|
|       | S                         | 0     | 0     | 0     | 0     | 0     | 0     | 0     | 9     | 0     | 0     | 0     | 0     | 0     | 0     | 0     | 0     | 0     | 9     |
|       | H                         | 1     | 1     | 1     | 1     | 1     | 1     | 1     | 2     | 1     | 1     | 1     | 1     | 1     | 1     | 1     | 1     | 1     | 2     |
|       | Hd                        | 0.000 | 0.000 | 0.000 | 0.000 | 0.000 | 0.000 | 0.000 | 0.258 | 0.000 | 0.000 | 0.000 | 0.000 | 0.000 | 0.000 | 0.000 | 0.000 | 0.000 | 0.388 |
|       | $\pi (\times 10^{-3})$    | 0.000 | 0.000 | 0.000 | 0.000 | 0.000 | 0.000 | 0.000 | 2.000 | 0.000 | 0.000 | 0.000 | 0.000 | 0.000 | 0.000 | 0.000 | 0.000 | 0.000 | 3.010 |
|       | $\theta (\times 10^{-3})$ | 0.000 | 0.000 | 0.000 | 0.000 | 0.000 | 0.000 | 0.000 | 1.890 | 0.000 | 0.000 | 0.000 | 0.000 | 0.000 | 0.000 | 0.000 | 0.000 | 0.000 | 1.120 |
| Lr618 | N                         | 12    | 20    | 20    | 20    | 20    | 20    | 20    | 17    | 11    | 20    | 18    | 20    | 10    | 20    | 20    | 17    | 10    | 295   |
|       | S                         | 0     | 0     | 0     | 0     | 0     | 0     | 0     | 15    | 0     | 0     | 15    | 0     | 15    | 1     | 0     | 0     | 1     | 19    |
|       | H                         | 1     | 1     | 1     | 1     | 1     | 1     | 1     | 2     | 1     | 1     | 2     | 1     | 2     | 2     | 1     | 1     | 2     | 5     |
|       | Hd                        | 0.000 | 0.000 | 0.000 | 0.000 | 0.000 | 0.000 | 0.000 | 0.214 | 0.000 | 0.000 | 0.056 | 0.000 | 0.100 | 0.097 | 0.000 | 0.000 | 0.442 | 0.515 |
|       | $\pi (\times 10^{-3})$    | 0.000 | 0.000 | 0.000 | 0.000 | 0.000 | 0.000 | 0.000 | 3.320 | 0.000 | 0.000 | 0.860 | 0.000 | 1.550 | 0.110 | 0.000 | 0.000 | 0.490 | 6.410 |
|       | $\theta (\times 10^{-3})$ | 0.000 | 0.000 | 0.000 | 0.000 | 0.000 | 0.000 | 0.000 | 3.800 | 0.000 | 0.000 | 3.740 | 0.000 | 4.370 | 0.260 | 0.000 | 0.000 | 0.310 | 2.710 |
| Lr81  | N                         | 12    | 20    | 20    | 20    | 20    | 20    | 20    | 17    | 11    | 19    | 18    | 20    | 9     | 19    | 20    | 17    | 10    | 292   |
|       | S                         | 0     | 0     | 0     | 0     | 0     | 0     | 0     | 15    | 0     | 0     | 0     | 0     | 0     | 0     | 0     | 0     | 0     | 15    |
|       | H                         | 1     | 1     | 1     | 1     | 1     | 1     | 1     | 2     | 1     | 1     | 1     | 1     | 1     | 1     | 1     | 1     | 1     | 2     |
|       | Hd                        | 0.000 | 0.000 | 0.000 | 0.000 | 0.000 | 0.000 | 0.000 | 0.258 | 0.000 | 0.000 | 0.000 | 0.000 | 0.000 | 0.000 | 0.000 | 0.000 | 0.000 | 0.391 |
|       | $\pi (\times 10^{-3})$    | 0.000 | 0.000 | 0.000 | 0.000 | 0.000 | 0.000 | 0.000 | 3.690 | 0.000 | 0.000 | 0.000 | 0.000 | 0.000 | 0.000 | 0.000 | 0.000 | 0.000 | 5.580 |
|       | $\theta (\times 10^{-3})$ | 0.000 | 0.000 | 0.000 | 0.000 | 0.000 | 0.000 | 0.000 | 3.490 | 0.000 | 0.000 | 0.000 | 0.000 | 0.000 | 0.000 | 0.000 | 0.000 | 0.000 | 2.060 |

Abbreviations: N, sample size; S, number of segregating (polymorphic) sites; H, number of haplotypes; Hd, haplotype diversity;  $\pi$ , nucleotide diversity;  $\theta$ , nucleotide polymorphism.

**Supplementary Table S2.** Averages of pairwise  $F_{ST}$  values amongst five populations of *Lumnitzera racemosa* based on Illumina sequencing data. Numbers in parenthesis are standard deviation (sd) of the  $F_{ST}$  values. Population abbreviations are defined in Table 1.

|    | QH                    | SY                    | KP                    | JH                    | KD |
|----|-----------------------|-----------------------|-----------------------|-----------------------|----|
| QH |                       |                       |                       |                       |    |
| SY | 0.031 ( $\pm 0.106$ ) |                       |                       |                       |    |
| KP | 0.065 ( $\pm 0.138$ ) | 0.044 ( $\pm 0.090$ ) |                       |                       |    |
| JH | 0.923 ( $\pm 0.217$ ) | 0.911 ( $\pm 0.231$ ) | 0.847 ( $\pm 0.196$ ) |                       |    |
| KD | 0.913 ( $\pm 0.229$ ) | 0.901 ( $\pm 0.241$ ) | 0.846 ( $\pm 0.206$ ) | 0.156 ( $\pm 0.334$ ) |    |

**Supplementary Table S3.** Pairwise estimates of Kxy values at the gene Lr104 in 17 populations of *Lummitzera racemosa*. Population abbreviations are defined in Table 1.

|    | GX     | SM     | SC     | QH     | SY     | DW     | QL     | KP     | YS     | TN     | KN     | BL     | TP    | JH    | KD    | BT    | RK |
|----|--------|--------|--------|--------|--------|--------|--------|--------|--------|--------|--------|--------|-------|-------|-------|-------|----|
| GX |        |        |        |        |        |        |        |        |        |        |        |        |       |       |       |       |    |
| SM | 0.075  |        |        |        |        |        |        |        |        |        |        |        |       |       |       |       |    |
| SC | 0.000  | 0.075  |        |        |        |        |        |        |        |        |        |        |       |       |       |       |    |
| QH | 2.175  | 2.141  | 2.175  |        |        |        |        |        |        |        |        |        |       |       |       |       |    |
| SY | 0.000  | 0.075  | 0.000  | 2.175  |        |        |        |        |        |        |        |        |       |       |       |       |    |
| DW | 4.525  | 4.453  | 4.525  | 2.423  | 4.525  |        |        |        |        |        |        |        |       |       |       |       |    |
| QL | 4.275  | 4.230  | 4.275  | 2.970  | 4.275  | 2.071  |        |        |        |        |        |        |       |       |       |       |    |
| KP | 2.235  | 2.299  | 2.235  | 4.069  | 2.235  | 6.043  | 5.746  |        |        |        |        |        |       |       |       |       |    |
| YS | 2.455  | 2.407  | 2.455  | 1.070  | 2.455  | 2.152  | 2.802  | 4.305  |        |        |        |        |       |       |       |       |    |
| TN | 1.650  | 1.665  | 1.650  | 2.085  | 1.650  | 3.815  | 4.005  | 3.697  | 2.141  |        |        |        |       |       |       |       |    |
| KN | 0.528  | 0.600  | 0.528  | 2.622  | 0.528  | 4.883  | 4.622  | 2.639  | 2.891  | 2.133  |        |        |       |       |       |       |    |
| BL | 1.425  | 1.493  | 1.425  | 3.383  | 1.425  | 5.493  | 5.213  | 3.325  | 3.634  | 2.955  | 1.874  |        |       |       |       |       |    |
| TP | 19.000 | 18.975 | 19.000 | 18.275 | 19.000 | 17.425 | 16.775 | 16.765 | 18.182 | 19.050 | 18.472 | 17.575 |       |       |       |       |    |
| JH | 19.000 | 18.975 | 19.000 | 18.275 | 19.000 | 17.425 | 16.775 | 16.765 | 18.182 | 19.050 | 18.472 | 17.575 | 0.000 |       |       |       |    |
| KD | 19.000 | 18.975 | 19.000 | 18.275 | 19.000 | 17.425 | 16.775 | 16.765 | 18.182 | 19.050 | 18.472 | 17.575 | 0.000 | 0.000 |       |       |    |
| BT | 19.000 | 18.975 | 19.000 | 18.275 | 19.000 | 17.425 | 16.775 | 16.765 | 18.182 | 19.050 | 18.472 | 17.575 | 0.000 | 0.000 | 0.000 |       |    |
| RK | 19.000 | 18.975 | 19.000 | 18.275 | 19.000 | 17.425 | 16.775 | 16.765 | 18.182 | 19.050 | 18.472 | 17.575 | 0.000 | 0.000 | 0.000 | 0.000 |    |

**Supplementary Table S4.** Pairwise estimates of Kxy values at the gene Lr265 in 17 populations of *Lumnitzera racemosa*. Population abbreviations are defined in Table 1.

|    | GX     | SM     | SC     | QH     | SY     | DW     | QL     | KP     | YS     | TN     | KN     | BL     | TP    | JH    | KD    | BT    | RK |
|----|--------|--------|--------|--------|--------|--------|--------|--------|--------|--------|--------|--------|-------|-------|-------|-------|----|
| GX |        |        |        |        |        |        |        |        |        |        |        |        |       |       |       |       |    |
| SM | 0.000  |        |        |        |        |        |        |        |        |        |        |        |       |       |       |       |    |
| SC | 0.000  | 0.000  |        |        |        |        |        |        |        |        |        |        |       |       |       |       |    |
| QH | 0.000  | 0.000  | 0.000  |        |        |        |        |        |        |        |        |        |       |       |       |       |    |
| SY | 0.000  | 0.000  | 0.000  | 0.000  |        |        |        |        |        |        |        |        |       |       |       |       |    |
| DW | 0.675  | 0.675  | 0.675  | 0.675  | 0.675  |        |        |        |        |        |        |        |       |       |       |       |    |
| QL | 0.625  | 0.625  | 0.625  | 0.625  | 0.625  | 0.456  |        |        |        |        |        |        |       |       |       |       |    |
| KP | 1.912  | 1.912  | 1.912  | 1.912  | 1.912  | 2.388  | 2.353  |        |        |        |        |        |       |       |       |       |    |
| YS | 0.000  | 0.000  | 0.000  | 0.000  | 0.000  | 0.675  | 0.625  | 1.912  |        |        |        |        |       |       |       |       |    |
| TN | 0.000  | 0.000  | 0.000  | 0.000  | 0.000  | 0.675  | 0.625  | 1.912  | 0.000  |        |        |        |       |       |       |       |    |
| KN | 0.722  | 0.722  | 0.722  | 0.722  | 0.722  | 1.322  | 1.278  | 2.422  | 0.722  | 0.722  |        |        |       |       |       |       |    |
| BL | 0.000  | 0.000  | 0.000  | 0.000  | 0.000  | 0.675  | 0.625  | 1.912  | 0.000  | 0.000  | 0.722  |        |       |       |       |       |    |
| TP | 13.000 | 13.000 | 13.000 | 13.000 | 13.000 | 12.325 | 12.375 | 11.088 | 13.000 | 13.000 | 12.278 | 13.000 |       |       |       |       |    |
| JH | 13.000 | 13.000 | 13.000 | 13.000 | 13.000 | 12.325 | 12.375 | 11.088 | 13.000 | 13.000 | 12.278 | 13.000 | 0.000 |       |       |       |    |
| KD | 13.000 | 13.000 | 13.000 | 13.000 | 13.000 | 12.325 | 12.375 | 11.088 | 13.000 | 13.000 | 12.278 | 13.000 | 0.000 | 0.000 |       |       |    |
| BT | 13.000 | 13.000 | 13.000 | 13.000 | 13.000 | 12.325 | 12.375 | 11.088 | 13.000 | 13.000 | 12.278 | 13.000 | 0.000 | 0.000 | 0.000 |       |    |
| RK | 13.000 | 13.000 | 13.000 | 13.000 | 13.000 | 12.325 | 12.375 | 11.088 | 13.000 | 13.000 | 12.278 | 13.000 | 0.000 | 0.000 | 0.000 | 0.000 |    |

**Supplementary Table S5.** Pairwise estimates of Kxy values at the gene Lr559 in 17 populations of *Lummitzera racemosa*. Population abbreviations are defined in Table 1.

|    | GX     | SM     | SC     | QH     | SY     | DW     | QL     | KP     | YS     | TN     | KN     | BL     | TP    | JH    | KD    | BT    | RK |
|----|--------|--------|--------|--------|--------|--------|--------|--------|--------|--------|--------|--------|-------|-------|-------|-------|----|
| GX |        |        |        |        |        |        |        |        |        |        |        |        |       |       |       |       |    |
| SM | 0.450  |        |        |        |        |        |        |        |        |        |        |        |       |       |       |       |    |
| SC | 0.150  | 0.465  |        |        |        |        |        |        |        |        |        |        |       |       |       |       |    |
| QH | 0.050  | 0.455  | 0.185  |        |        |        |        |        |        |        |        |        |       |       |       |       |    |
| SY | 0.075  | 0.458  | 0.203  | 0.118  |        |        |        |        |        |        |        |        |       |       |       |       |    |
| DW | 1.000  | 0.550  | 0.850  | 0.950  | 0.925  |        |        |        |        |        |        |        |       |       |       |       |    |
| QL | 1.000  | 0.550  | 0.850  | 0.950  | 0.925  | 0.000  |        |        |        |        |        |        |       |       |       |       |    |
| KP | 2.441  | 2.415  | 2.432  | 2.438  | 2.437  | 2.382  | 2.382  |        |        |        |        |        |       |       |       |       |    |
| YS | 1.273  | 1.641  | 1.395  | 1.314  | 1.334  | 2.091  | 2.091  | 3.270  |        |        |        |        |       |       |       |       |    |
| TN | 2.150  | 2.420  | 2.240  | 2.180  | 2.195  | 2.750  | 2.750  | 3.806  | 3.032  |        |        |        |       |       |       |       |    |
| KN | 1.361  | 0.911  | 1.211  | 1.311  | 1.286  | 0.361  | 0.361  | 2.637  | 2.386  | 3.003  |        |        |       |       |       |       |    |
| BL | 0.975  | 0.548  | 0.833  | 0.928  | 0.904  | 0.025  | 0.025  | 2.384  | 2.070  | 2.735  | 0.386  |        |       |       |       |       |    |
| TP | 11.850 | 11.490 | 11.730 | 11.810 | 11.790 | 11.050 | 11.050 | 10.118 | 10.968 | 10.355 | 10.803 | 11.070 |       |       |       |       |    |
| JH | 14.000 | 13.550 | 13.850 | 13.950 | 13.925 | 13.000 | 13.000 | 11.559 | 12.727 | 11.850 | 12.639 | 13.025 | 2.150 |       |       |       |    |
| KD | 14.000 | 13.550 | 13.850 | 13.950 | 13.925 | 13.000 | 13.000 | 11.559 | 12.727 | 11.850 | 12.639 | 13.025 | 2.150 | 0.000 |       |       |    |
| BT | 13.000 | 12.550 | 12.850 | 12.950 | 12.925 | 12.000 | 12.000 | 10.853 | 11.909 | 11.150 | 11.694 | 12.025 | 2.650 | 1.000 | 1.000 |       |    |
| RK | 13.000 | 12.550 | 12.850 | 12.950 | 12.925 | 12.000 | 12.000 | 10.853 | 11.909 | 11.150 | 11.694 | 12.025 | 2.650 | 1.000 | 1.000 | 0.000 |    |

**Supplementary Table S6.** Pairwise estimates of Kxy values at the gene Lr598 in 17 populations of *Lumnitzera racemosa*. Population

abbreviations are defined in Table 1.

|    | GX    | SM    | SC    | QH    | SY    | DW    | QL    | KP    | YS    | TN    | KN    | BL    | TP    | JH    | KD    | BT    | RK |
|----|-------|-------|-------|-------|-------|-------|-------|-------|-------|-------|-------|-------|-------|-------|-------|-------|----|
| GX |       |       |       |       |       |       |       |       |       |       |       |       |       |       |       |       |    |
| SM | 0.000 |       |       |       |       |       |       |       |       |       |       |       |       |       |       |       |    |
| SC | 0.000 | 0.000 |       |       |       |       |       |       |       |       |       |       |       |       |       |       |    |
| QH | 0.000 | 0.000 | 0.000 |       |       |       |       |       |       |       |       |       |       |       |       |       |    |
| SY | 0.000 | 0.000 | 0.000 | 0.000 |       |       |       |       |       |       |       |       |       |       |       |       |    |
| DW | 0.000 | 0.000 | 0.000 | 0.000 | 0.000 |       |       |       |       |       |       |       |       |       |       |       |    |
| QL | 0.000 | 0.000 | 0.000 | 0.000 | 0.000 | 0.000 |       |       |       |       |       |       |       |       |       |       |    |
| KP | 1.324 | 1.324 | 1.324 | 1.324 | 1.324 | 1.324 | 1.324 |       |       |       |       |       |       |       |       |       |    |
| YS | 0.000 | 0.000 | 0.000 | 0.000 | 0.000 | 0.000 | 0.000 | 1.324 |       |       |       |       |       |       |       |       |    |
| TN | 0.000 | 0.000 | 0.000 | 0.000 | 0.000 | 0.000 | 0.000 | 1.324 | 0.000 |       |       |       |       |       |       |       |    |
| KN | 0.000 | 0.000 | 0.000 | 0.000 | 0.000 | 0.000 | 0.000 | 1.324 | 0.000 | 0.000 |       |       |       |       |       |       |    |
| BL | 0.000 | 0.000 | 0.000 | 0.000 | 0.000 | 0.000 | 0.000 | 1.324 | 0.000 | 0.000 | 0.000 |       |       |       |       |       |    |
| TP | 9.000 | 9.000 | 9.000 | 9.000 | 9.000 | 9.000 | 9.000 | 7.676 | 9.000 | 9.000 | 9.000 | 9.000 |       |       |       |       |    |
| JH | 9.000 | 9.000 | 9.000 | 9.000 | 9.000 | 9.000 | 9.000 | 7.676 | 9.000 | 9.000 | 9.000 | 9.000 | 0.000 |       |       |       |    |
| KD | 9.000 | 9.000 | 9.000 | 9.000 | 9.000 | 9.000 | 9.000 | 7.676 | 9.000 | 9.000 | 9.000 | 9.000 | 0.000 | 0.000 |       |       |    |
| BT | 9.000 | 9.000 | 9.000 | 9.000 | 9.000 | 9.000 | 9.000 | 7.676 | 9.000 | 9.000 | 9.000 | 9.000 | 0.000 | 0.000 | 0.000 |       |    |
| RK | 9.000 | 9.000 | 9.000 | 9.000 | 9.000 | 9.000 | 9.000 | 7.676 | 9.000 | 9.000 | 9.000 | 9.000 | 0.000 | 0.000 | 0.000 | 0.000 |    |

**Supplementary Table S7.** Pairwise estimates of Kxy values at the gene Lr618 in 17 populations of *Lumnitzera racemosa*. Population abbreviations are defined in Table 1.

|    | GX     | SM     | SC     | QH     | SY     | DW     | QL     | KP     | YS     | TN     | KN     | BL     | TP    | JH    | KD    | BT    | RK |
|----|--------|--------|--------|--------|--------|--------|--------|--------|--------|--------|--------|--------|-------|-------|-------|-------|----|
| GX |        |        |        |        |        |        |        |        |        |        |        |        |       |       |       |       |    |
| SM | 0.000  |        |        |        |        |        |        |        |        |        |        |        |       |       |       |       |    |
| SC | 0.000  | 0.000  |        |        |        |        |        |        |        |        |        |        |       |       |       |       |    |
| QH | 0.000  | 0.000  | 0.000  |        |        |        |        |        |        |        |        |        |       |       |       |       |    |
| SY | 0.000  | 0.000  | 0.000  | 0.000  |        |        |        |        |        |        |        |        |       |       |       |       |    |
| DW | 0.000  | 0.000  | 0.000  | 0.000  | 0.000  |        |        |        |        |        |        |        |       |       |       |       |    |
| QL | 0.000  | 0.000  | 0.000  | 0.000  | 0.000  | 0.000  |        |        |        |        |        |        |       |       |       |       |    |
| KP | 1.765  | 1.765  | 1.765  | 1.765  | 1.765  | 1.765  | 1.765  |        |        |        |        |        |       |       |       |       |    |
| YS | 0.000  | 0.000  | 0.000  | 0.000  | 0.000  | 0.000  | 0.000  | 1.765  |        |        |        |        |       |       |       |       |    |
| TN | 0.000  | 0.000  | 0.000  | 0.000  | 0.000  | 0.000  | 0.000  | 1.765  | 0.000  |        |        |        |       |       |       |       |    |
| KN | 0.417  | 0.417  | 0.417  | 0.417  | 0.417  | 0.417  | 0.417  | 2.083  | 0.417  | 0.417  |        |        |       |       |       |       |    |
| BL | 0.000  | 0.000  | 0.000  | 0.000  | 0.000  | 0.000  | 0.000  | 1.765  | 0.000  | 0.000  | 0.417  |        |       |       |       |       |    |
| TP | 14.250 | 14.250 | 14.250 | 14.250 | 14.250 | 14.250 | 14.250 | 12.662 | 14.250 | 14.250 | 13.875 | 14.250 |       |       |       |       |    |
| JH | 15.050 | 15.050 | 15.050 | 15.050 | 15.050 | 15.050 | 15.050 | 13.285 | 15.050 | 15.050 | 14.633 | 15.050 | 0.800 |       |       |       |    |
| KD | 15.000 | 15.000 | 15.000 | 15.000 | 15.000 | 15.000 | 15.000 | 13.235 | 15.000 | 15.000 | 14.583 | 15.000 | 0.750 | 0.050 |       |       |    |
| BT | 16.000 | 16.000 | 16.000 | 16.000 | 16.000 | 16.000 | 16.000 | 14.235 | 16.000 | 16.000 | 15.583 | 16.000 | 1.750 | 1.050 | 1.000 |       |    |
| RK | 15.700 | 15.700 | 15.700 | 15.700 | 15.700 | 15.700 | 15.700 | 13.935 | 15.700 | 15.700 | 15.283 | 15.700 | 1.450 | 0.750 | 0.700 | 0.300 |    |



**Supplementary Table S8.** Pairwise estimates of Kxy values at the gene Lr81 in 17 populations of *Lumnitzera racemosa*. Population

abbreviations are defined in Table 1.

|    | GX     | SM     | SC     | QH     | SY     | DW     | QL     | KP     | YS     | TN     | KN     | BL     | TP    | JH    | KD    | BT    | RK |
|----|--------|--------|--------|--------|--------|--------|--------|--------|--------|--------|--------|--------|-------|-------|-------|-------|----|
| GX |        |        |        |        |        |        |        |        |        |        |        |        |       |       |       |       |    |
| SM | 0.000  |        |        |        |        |        |        |        |        |        |        |        |       |       |       |       |    |
| SC | 0.000  | 0.000  |        |        |        |        |        |        |        |        |        |        |       |       |       |       |    |
| QH | 0.000  | 0.000  | 0.000  |        |        |        |        |        |        |        |        |        |       |       |       |       |    |
| SY | 0.000  | 0.000  | 0.000  | 0.000  |        |        |        |        |        |        |        |        |       |       |       |       |    |
| DW | 0.000  | 0.000  | 0.000  | 0.000  | 0.000  |        |        |        |        |        |        |        |       |       |       |       |    |
| QL | 0.000  | 0.000  | 0.000  | 0.000  | 0.000  | 0.000  |        |        |        |        |        |        |       |       |       |       |    |
| KP | 2.206  | 2.206  | 2.206  | 2.206  | 2.206  | 2.206  | 2.206  |        |        |        |        |        |       |       |       |       |    |
| YS | 0.000  | 0.000  | 0.000  | 0.000  | 0.000  | 0.000  | 0.000  | 2.206  |        |        |        |        |       |       |       |       |    |
| TN | 0.000  | 0.000  | 0.000  | 0.000  | 0.000  | 0.000  | 0.000  | 2.206  | 0.000  |        |        |        |       |       |       |       |    |
| KN | 0.000  | 0.000  | 0.000  | 0.000  | 0.000  | 0.000  | 0.000  | 2.206  | 0.000  | 0.000  |        |        |       |       |       |       |    |
| BL | 0.000  | 0.000  | 0.000  | 0.000  | 0.000  | 0.000  | 0.000  | 2.206  | 0.000  | 0.000  | 0.000  |        |       |       |       |       |    |
| TP | 15.000 | 15.000 | 15.000 | 15.000 | 15.000 | 15.000 | 15.000 | 12.794 | 15.000 | 15.000 | 15.000 | 15.000 |       |       |       |       |    |
| JH | 15.000 | 15.000 | 15.000 | 15.000 | 15.000 | 15.000 | 15.000 | 12.794 | 15.000 | 15.000 | 15.000 | 15.000 | 0.000 |       |       |       |    |
| KD | 15.000 | 15.000 | 15.000 | 15.000 | 15.000 | 15.000 | 15.000 | 12.794 | 15.000 | 15.000 | 15.000 | 15.000 | 0.000 | 0.000 |       |       |    |
| BT | 15.000 | 15.000 | 15.000 | 15.000 | 15.000 | 15.000 | 15.000 | 12.794 | 15.000 | 15.000 | 15.000 | 15.000 | 0.000 | 0.000 | 0.000 |       |    |
| RK | 15.000 | 15.000 | 15.000 | 15.000 | 15.000 | 15.000 | 15.000 | 12.794 | 15.000 | 15.000 | 15.000 | 15.000 | 0.000 | 0.000 | 0.000 | 0.000 |    |
